# Supplementary material for: Campylobacteriosis Agents in Meat Carcasses Collected from Two District Municipalities in the Eastern Cape Province, South Africa
Source: PubMed Central journal article supplement (PMC7074574; doi:10.3390/foods9020203), 2020-02-16
Supplement: foods-09-00203-s001.pdf [file foods-09-00203-s001.pdf]

**Table S1.** Primers sets used for the identification of different *Campylobacter* species.

| Target Strain    | Primer Sets                                                 | Targeted Genes | Base Pairs | PCR Condition (°C)                                 | Cycles | Reference |
|------------------|-------------------------------------------------------------|----------------|------------|----------------------------------------------------|--------|-----------|
| <i>C. fetus</i>  | F: GGTAGCCGCAGCTGCTAAGAT<br>R: AGCCAGTAACGCATATTATAGTAG     | <i>cstA</i>    | 359 bp     | 95°, 95°, 50°, 72°, 72°<br>15', 30", 1'30", 1', 7' | 25     | [41]      |
| <i>C. coli</i>   | F: GCTTCGCATAGCTAACAT<br>R: GGTATGATTTCTACAAAGCGAG          | <i>asK</i>     | 502 bp     | 95°, 95°, 50°, 72°, 72°<br>15', 30", 1'30", 1', 7' | 25     | [41]      |
| <i>C. lari</i>   | F: TAGAGAGATAGCAAAAGAGA<br>R: TACACATAATAATCCCACCC          | <i>glyA</i>    | 251 bp     | 95°, 95°, 46°, 72°, 72°<br>6', 30", 30", 30" 7'    | 30     | [41]      |
| <i>C. jejuni</i> | F:<br>CAAATAAAGTTAGAGGTAGAATGT<br>R: CCATAAGCACTAGCTAGCTGAT | <i>cj0414</i>  | 161 bp     | 95°, 95°, 50°, 72°, 72°<br>15', 30", 1'30", 1', 7' | 25     | [41]      |

**Table S2.** Oligonucleotide sequence use for detection of virulence genes.

| Virulence Factors                     | Primer Sequence                                                  | Targeted Genes | Base Pairs | PCR Conditions                                | References |
|---------------------------------------|------------------------------------------------------------------|----------------|------------|-----------------------------------------------|------------|
| Flagella adherence & colonization     | F:<br>GGATTTTCGTATTAACACAAATGGTGC<br>R: CTGTAGTAATCTTAAAACATTTTG | <i>flaA</i>    | 1723 bp    | 95°, 94°, 50°, 72°, 72°<br>4', 1', 1', 1', 5' | [24]       |
| <i>C. adherence gene</i>              | F: TTGAAGGTAATTTAGATATG<br>R: CTAATACCTAAAGTTGAAAC               | <i>cadF</i>    | 400 bp     | 95°, 94°, 42°, 72°, 72°<br>4', 1', 1', 1', 5' | [24]       |
| Invasion associated marker            | F: GCGCAAATATTATCACCC<br>R: TTCACGACTACTATGCGG                   | <i>iam</i>     | 519 bp     | 95°, 94°, 47°, 72°, 72°<br>4', 1', 1', 1', 5' | [42]       |
| <i>C. invasion protein B</i>          | F: TTTCCAAATTTAGATGATGC<br>R: GTTCTTTAAATTTTTCATAATGC            | <i>ciaB</i>    | 1165 bp    | 95°, 94°, 43°, 72°, 72°<br>4', 1', 1', 1', 5' | [43]       |
| Flagella synthesis & modification     | F: GAGCGTTTAGAATGGGTGTG<br>R: GCCAGGAATTGATGGCATAG               | <i>flgR</i>    | 390 bp     | 95°, 94°, 50°, 72°, 72°<br>4', 1', 1', 1', 5' | [44]       |
| Cytolethal distending toxin subunit B | F: GTTGGCACTTGGAATTTGCAAGGC<br>R: GTTAAAATCCCCTGCTATCAACCA       | <i>cdtB</i>    | 495 bp     | 95°, 94°, 55°, 72°, 72°<br>4', 1', 1', 1', 5' | [24]       |

**Table S3.** Primer sequence use for detection of resistance genes.

| Antibiotics  | Primer      | Primer Sequence (5'-3')                              | Base pair | PCR Conditions                                  | Cycle | Reference |
|--------------|-------------|------------------------------------------------------|-----------|-------------------------------------------------|-------|-----------|
| Tetracycline | <i>tetA</i> | F: GCTACATCCTGCTTGCCTTC<br>R: CATAGATCGCCGTGAAGAGG   | 201 bp    | 94°, 94°, 55°, 72°, 72°<br>5', 1', 1', 1.5', 5' | 35    | [47]      |
|              | <i>tetB</i> | F: TTGGTTAGGGCAAGTTTTG<br>R: GTAATGGGCCAATAACACCG    | 359 bp    | 94°, 94°, 55°, 72°, 72°<br>5', 1', 1', 1.5', 5' | 35    | [47]      |
|              | <i>tetC</i> | F: CTTGAGAGCCTTCAACCCAG<br>R: ATGGTCGTCATCTACCTGCC   | 418 bp    | 94°, 94°, 55°, 72°, 72°<br>5', 1', 1', 1.5', 5' | 35    | [47]      |
|              | <i>tetD</i> | F: AAACCATTACGGCATTCTGC<br>R: GACCGGATACACCATCCATC   | 300 bp    | 94°, 94°, 55°, 72°, 72°<br>5', 1', 1', 1.5', 5' | 35    | [47]      |
|              | <i>tetK</i> | F: GTAGCGACAATAGGTAATAGT<br>R: GTAGTGACAATAAACCTCCTA | 460 bp    | 94°, 94°, 55°, 72°, 72°<br>5', 1', 1', 1.5', 5' | 35    | [48]      |
|              | <i>tetM</i> | F: AGTGGAGCGATTACAGAA<br>R: CATATGTCCTGGCGTGTCTA     | 158 bp    | 94°, 94°, 55°, 72°, 72°<br>5', 1', 1', 1.5', 5' | 35    | [48]      |

|                 |                                                    |                                                           |        |                                                   |    |      |
|-----------------|----------------------------------------------------|-----------------------------------------------------------|--------|---------------------------------------------------|----|------|
| Ciprofloxacin   | <i>gyrA</i>                                        | F: CGCGTACTATACGCCATGAACCTA<br>R: ACCGTTGATCACTTCGGTCAGG  | 441 bp | 95°, 94°, 55°, 72°, 72°<br>3', 1', 1', 1.5', 5'   | 35 | [49] |
| Erythromycin    | <i>ermB</i>                                        | F: CGAGTGAAAAAGTACTCAACC<br>R: GGCGTGTTTCATTGCTTGATG      | 320 bp | 94°, 94°, 55°, 72°, 72°<br>3', 1', 1', 1', 10'    | 35 | [50] |
| Chloramphenicol | <i>catI</i>                                        | F: AGTTGCTCAATGTACCTATAACC<br>R: TTGTAATTCATTAAGCATTCTGCC | 320 bp | 94°, 94°, 50°, 72°, 72°<br>5', 30", 30", 1.5', 5' | 30 | [51] |
|                 | <i>catIII</i>                                      | F: ACACITTTGCCCTTTATCGTC<br>R: TGAAAGCCATCACATACTGC       | 543 bp | 94°, 94°, 50°, 72°, 72°<br>5', 30", 30", 1.5', 5' | 30 | [51] |
| Gentamycin      | <i>aac(3)-IIa</i><br>( <i>aacC2</i> ) <sup>a</sup> | F: CGGAAGGCAATAACGGAG<br>R: TCGAACAGGTAGCACTGAG           | 740 bp | 94°, 94°, 50°, 72°, 72°<br>5', 30", 30", 1.5', 5' | 30 | [51] |
| Ampicillin      | <i>ampC</i>                                        | F: TTCTATCAAMACTGGCARCC<br>R: CCYTTTTATGTACCCAYGA         | 550 bp | 94°, 94°, 45°, 72°, 72°<br>4', 45", 45", 45", 7'  | 30 | [52] |
| Imipenem        | <i>GES-1-9</i>                                     | F: AGTCGGCTAGACCGGAAAG<br>R: TTTGTCCGTGCTCAGGAT           | 399 bp | 94°, 94°, 55°, 72°, 72°<br>10', 40", 40", 1', 7'  | 30 | [53] |
|                 | <i>GES-11</i>                                      | F: GCTTGATCGCCCTCGATT<br>R: GATTTGCTCCGTGGCCGAAA          | 281 bp | 94°, 94°, 55°, 72°, 72°<br>10', 40", 40", 1', 7'  | 30 | [53] |
|                 | <i>blas-oxa-48-like</i>                            | F: TTGACACTCCATTTACDG<br>R: GATYGAGAATTAAGCCACYCT         | 139 bp | 94°, 94°, 57°, 72°, 72°<br>10', 40", 40", 1', 7'  | 30 | [53] |
|                 | <i>IMP</i>                                         | F: GATGGTGTTTGGTCCGATA<br>R: CGAATGCGCAGCACCAG            | 390 bp | 94°, 94°, 57°, 72°, 72°<br>10', 40", 40", 1', 7'  | 30 | [53] |
|                 | <i>VIM</i>                                         | F: CATTCAAGGGCTTTCTTGCTGC<br>R: ACGACGGCATAGTCATTGTC      | 538 bp | 94°, 94°, 57°, 72°, 72°<br>10', 40", 40", 1', 7'  | 30 | [53] |
